# Supplementary material
Source: PubMed Central journal article supplement (PMC4269831)
Supplement: NIHMS635971-supplement-1.pdf [file NIHMS635971-supplement-1.pdf]

# **Efficient ablation of genes in human hematopoietic stem and effector cells using CRISPR/Cas9**

Pankaj K. Mandal<sup>1,2,14</sup>, Leonardo M. R. Ferreira<sup>1,3,14</sup>, Ryan Collins<sup>4</sup>, Torsten B. Meissner<sup>1</sup>, Christian L. Boutwell<sup>5</sup>, Max Friesen<sup>1</sup>, Vladimir Vrbancac<sup>5,6</sup>, Brian S. Garrison<sup>1,2,7</sup>, Alexei Stortchevoi<sup>4</sup>, David Bryder<sup>8</sup>, Kiran Musunuru<sup>1,9,10,11</sup>, Harrison Brand<sup>4</sup>, Andrew M. Tager<sup>5,6</sup>, Todd M. Allen<sup>5</sup>, Michael E. Talkowski<sup>4,11,12</sup>, Derrick J. Rossi<sup>1,2,7,9,15</sup> and Chad A. Cowan<sup>1,9,11,13,15</sup>

## **SUPPLEMENTAL DATA**

Inventory of supplemental data

1. Experimental Procedures
2. Supplemental Figures S1 (related to Figure 1), S2 (related to Figure 2) and S3 (related to Figure 4) and associated figure legends.
3. Supplemental Tables S1-S5. Supplemental Table S1-S5 relate to our mutational analysis (Figure 4).
4. Supplemental references
