# Supplementary material
Source: PubMed Central journal article supplement (PMC4269831)
Supplement: NIHMS635971-supplement-2.pdf [file NIHMS635971-supplement-2.pdf]

# Efficient ablation of genes in human hematopoietic stem and effector cells using CRISPR/Cas9

Pankaj K. Mandal<sup>1,2,14</sup>, Leonardo M. R. Ferreira<sup>1,3,14</sup>, Ryan Collins<sup>4</sup>, Torsten B. Meissner<sup>1</sup>, Christian L. Boutwell<sup>5</sup>, Max Friesen<sup>1</sup>, Vladimir Vrbancac<sup>5,6</sup>, Brian S. Garrison<sup>1,2,7</sup>, Alexei Stortchevoi<sup>4</sup>, David Bryder<sup>8</sup>, Kiran Musunuru<sup>1,9,10,11</sup>, Harrison Brand<sup>4</sup>, Andrew M. Tager<sup>5,6</sup>, Todd M. Allen<sup>5</sup>, Michael E. Talkowski<sup>4,11,12</sup>, Derrick J. Rossi<sup>1,2,7,9,15</sup> and Chad A. Cowan<sup>1,9,11,13,15</sup>

## SUPPLEMENTAL DATA

### EXPERIMENTAL PROCEDURES

#### Molecular Biology

We subcloned a human-codon-optimized *Cas9* gene with a C-terminal nuclear localization signal (Mali et al., 2013) into a CAG expression plasmid with 2A-GFP (Ding et al., 2013). The guide RNAs (gRNAs) were separately expressed from a plasmid with the human *U6* polymerase III promoter (Mali et al., 2013). Each gRNA sequence was introduced in this plasmid using *BbsI* restriction sites. All guides were designed using the online optimized design tool at <http://crispr.mit.edu>. gRNA and primer sequences are enlisted under **List of reagents** at the end of experimental procedures.

#### Primary blood cell isolation

Primary CD4<sup>+</sup> T cells were isolated from peripheral blood (Leukopacs, MGH) using RosetteSep CD4<sup>+</sup> T cell enrichment cocktail (STEMCELL Technologies). CD34<sup>+</sup> cells from G-CSF mobilized peripheral blood were purchased from AllCells.

#### Cell culture

HEK293T, K562 and T cells were cultured in RPMI-1640 medium supplemented with 10% FBS. CD34<sup>+</sup> HSPCs were cultured in DMEM/F12 medium supplemented with 10% FBS,  $\beta$ -mercaptoethanol, GlutaMax, Pencillin-Streptomycin, minimum non-essential

amino acid and human cytokine cocktails (GM-CSF, SCF, TPO, Flt3 ligand, IL3, IL6). Cell lines were passaged every 3-4 days.

### **Transfection of Cells**

Human primary CD4<sup>+</sup> T cells and CD34<sup>+</sup> HSPCs were transfected with Cas9-2A-GFP and gRNA encoding plasmids using respective Amaxa Nucleofection kits (Human CD34 cell Nucleofector kit #VPA-1003 for CD34<sup>+</sup> HSPCs, Human T cell Nucleofector kit #VPA-1002 for CD4<sup>+</sup> T cells, and Cell Line Nucleofector kit V #VCA-1003 for K562 cells) and cell-specific Nucleofection program (U-008 for CD34<sup>+</sup> HSPCs, U-014 for CD4<sup>+</sup> T cells, and T-016 for K562 cells) with an Amaxa Nucleofection II device as per manufacturers instructions with minor modifications. HEK293T cells were seeded in 6-well plates the day before transfection and transfected using Fugene 6 (Promega). For dual gRNA combinations in CD34<sup>+</sup> HSPCs, individual gRNAs were used at half the amount of single gRNA conditions, keeping total gRNA amount the same across the experimental settings.

### **Cell sorting**

For the *CCR5* targeting experiments in CD34<sup>+</sup> HSPCs, cells were thawed and cultivated for 6-8 hours in complete DMEM/F12 medium prior to transfection. Following transfection, cells were plated in antibiotic free medium. 24 hours post-transfection, cells were harvested in sample medium (2% FBS and 2 mM EDTA in PBS without Ca<sup>2+</sup> and Mg<sup>2+</sup>) and HSPCs were stained with anti-CD34-PE/Cy7 (clone: 581, Biolegend, 1:100) for 20 min on ice. Live, GFP<sup>+</sup> CD34<sup>+</sup> HSPCs were sorted using an Aria II sorter (BD Bioscience) and plated in complete DMEM/F12 medium supplemented with human cytokine cocktail and culture for 72 hours prior to analysis. For the B2M experiments, cells were stained with mouse monoclonal anti-B2M-APC antibody (clone: 2M2, Biolegend) 48 or 72 hours post-transfection to estimate loss of B2M expression. FACS data were analyzed using FlowJo software.

### **Colony forming cell (CFC) assay**

1500 sorted CD34<sup>+</sup> HSPCs were plated in 1.5 ml of methylcellulose (MethoCult™ H4034 Optimum, Stem Cell Technologies) on a 35 mm cell culture dish and cultured for two weeks at 37 °C in a 5% CO<sub>2</sub> incubator. Colonies were then counted and scored.

### **Surveyor/CEL assay**

Amplicons spanning the different targeted regions were PCR amplified using the Phusion polymerase and HF Buffer (New England Biolabs) and CEL assay was carried out using the Surveyor Mutation detection kit (Transgenomic) according to the manufacturer's instructions, with minor modifications.

### **Clonal analysis**

Colonies grown in MethoCult™ H4034 Optimum were individually picked and lysed in 50 µl of lysis buffer containing detergent and Proteinase K buffer (van der Burg et al., 2011). Samples were digested at 56 °C for 1 h followed by Proteinase K inactivation at 95 °C for 15 min. 50 µl of water with RNase A were added to the samples. 2 µl of samples were used for PCR. A 436 bp amplicon spanning the targeted region was PCR amplified using GoTaq® Green Master Mix (Promega) as per manufacturer's instructions. For single gRNA experiments, PCR products were analyzed by Sanger sequencing (Macrogen). For dual gRNA experiments, PCR products were analyzed by agarose gel electrophoresis.

### **In vivo transplantation of CD34<sup>+</sup> HSPCs**

NOD/SCID/IL2R $\gamma^{-/-}$  (NSG) mice (The Jackson Laboratory) were housed in a pathogen-free facility, maintained in microisolator cages, and fed autoclaved food and water. Adult (6-8 weeks of age) NSG mice were conditioned with sub-lethal (2 Gy) whole-body irradiation. The conditioned recipients were transplanted with 75,000-sorted CD34<sup>+</sup> HSPCs expressing Cas9 alone (control group, n=2) or Cas9 with crCCR5\_D+Q gRNAs (experimental group, n=5). At 12 weeks post-transplantation, all mice were euthanized and blood, bone marrow, and spleen samples were taken for characterization of human hematopoietic cell chimerism. Human CD45<sup>+</sup> cells were sorted for DNA isolation and analysis of CCR5 deletion.

### **Single Cell PCR assay**

48 h after electroporation with Cas9 and different gRNA combinations, GFP<sup>+</sup> primary CD4<sup>+</sup> T cells were sorted into 384-well plates (Twin tec skirted PCR plate, Eppendorf) containing 4 µl of prepGEM Tissue (ZyGEM) per well. Cells were lysed and digested following the manufacturer's instructions to release the genomic DNA. A multiplexed

nested PCR was then carried out in the same plate with the primer combinations represented in Supplemental Figures S2C and S2F. The resulting DNA was then used in two subsequent PCR reactions, one amplifying a positive control region, to determine successful genomic DNA isolation from a single cell, and another one amplifying a region lying between the two gRNA binding sites, allowing us to quantify the percentage of cells homozygous for the dual gRNA induced deletion (Supplemental Figures S2D and S2G). Cells were scored based on the melting curves of the PCR amplicons. PCR reactions were performed using an Applied Biosystems ViiA 7 real-Time PCR System (Life Technologies).

### **Off-Target Prediction and Capture Sequencing**

Degenerate gRNA off-target sequences were predicted for each gRNA targeting *CCR5* using the CRISPR Design off-target prediction tool (Hsu et al., 2013). Off-target sequences were further supplemented by alignment of each gRNA to the human genome using BOWTIE of which all results up to and including 3 mismatches were added to the total off-target list (Langmead et al., 2009). All instances of each predicted off-target sequence existent in the human genome reference build GRCh37v71 were recorded (Supplementary Table T1). Each guide RNA target site (n=5) and predicted off-target site (n=126) was selected for capture sequencing using the Agilent SureSelectXT Target Enrichment System. Capture intervals were expanded by approximately 500 bp in both the 5' and 3' directions to ensure exhaustive capture of the targeted region and detection of any genetic lesion occurring at or near a predicted gRNA on- or off-target site, as we have previously shown accurate capability to detect translocations and inversions using targeted capture of probes in proximity to a rearrangement breakpoint using a CapBP procedure as described (Talkowski et al., 2011). Probes were tiled with 60-fold greater density over each predicted 23bp on- or off-target gRNA binding site than the flanking kilobase of sequence. Isogenic CD34<sup>+</sup> HSPCs-mPB were transfected with CRISPR/Cas9 plasmids (one Cas9 only-treated control group, three treatment groups transfected with a single gRNA, and three treatment groups transfected with dual gRNAs). Sorted CD34<sup>+</sup> genome edited HSPCs were cultured for two weeks prior to DNA isolation. Capture libraries were prepared from DNA extracted from seven treatment groups. Capture libraries were sequenced as 101 bp paired-end reads on an Illumina HiSeq2000 platform.

## **NGS Data Processing and Computational Analysis**

Read pairs were aligned to GRCh37v71 with Bwa-MEM v0.7.10-r789 (Li, arXiv 2013). Alignments were processed using PicardTools and SAMBLASTER (Faust and Hall, 2014). The Genome Analysis Toolkit (GATK) v3.1-1-g07a4bf8 was applied for base quality score recalibration, insertion/deletion (InDel) realignment, duplicate removal, and single nucleotide variant (SNV) and InDel discovery and genotyping per published best-practice protocols (McKenna et al, Genome Res 2010; DePristo et al, Nat Genet 2011; Van der Auwera et al, 2013). SNVs and InDels were annotated using ANNOVAR (Wang et al., 2010). Structural variants (SVs) were detected with LUMPY v0.2.5 considering both anomalous pair and split read evidence at a minimum call weight threshold of 7 and an evidence set score  $\leq 0.05$  (Layer et al., 2014). Candidate copy number variants (CNVs) were further statistically assessed by Student's t-test for a concomitant change in depth of coverage across the putative CNV. As a final exhaustive measure, each on- and off-target site was manually scrutinized in each capture library for evidence supporting predictable mutagenesis that is not detectable by the computational algorithms due to low levels of mosaicism in the sequenced population.

## **Evaluation of Off-Target Mutation Frequency**

A statistical framework was developed to assess off-target mutational burden for each gRNA. For each off-target site (n=126), all reads with at least one nucleotide of overlap with that 23bp off-target site were collected and their CIGAR information was tabulated into categories as follows: reads representing small InDels (CIGAR contains at least one "I" or "D"), reads potentially representative of other rearrangements (CIGAR contains at least one "S" or "H"), and reads reflecting reference sequence (CIGAR did not match either of the two former categories). Such counts were gathered at all 126 sites in all seven libraries and were further pooled to form comparison groups of "treatment" libraries (transfected gRNA matches corresponding off-target site gRNA) and "control" libraries (transfected gRNA does not match corresponding off-target site gRNA). Next, at each off-target site, relative n-fold enrichment of each read classification between treatment and control libraries was evaluated. Finally, a one-tailed Fisher's Exact Test was performed to assess the statistical significance of enrichment of variant reads in treatments versus controls at each off-target site, followed by Bonferroni correction to retain an experiment-wide significance threshold of  $\alpha = 0.05$ .

## List of Reagents

### **Guides targeting CCR5.**

| <b>Guide ID</b> | <b>Sequence</b>      |
|-----------------|----------------------|
| crCCR5_A        | GCTGCCGCCAGTGGGACTT  |
| crCCR5_B        | GATCTGGTAAAGATGATTCC |
| crCCR5_C        | ACAATGTGTCAACTCTTGAC |
| crCCR5_D        | TCACTATGCTGCCGCCAGT  |
| crCCR5_O        | GGTGACAAGTGTGATCACTT |
| crCCR5_P        | GACAAGTGTGATCACTTGGG |
| crCCR5_Q        | GCTGTGTTTGCCTCTCTCCC |

### **Guides targeting B2M**

| <b>Guide ID</b> | <b>Sequence</b>      |
|-----------------|----------------------|
| crB2M_1         | GATGTCTCGCTCCGTGGCCT |
| crB2M_2         | CTCGCGCTACTCTCTCTTTT |
| crB2M_3         | GACTCACGCTGGATAGCCTC |
| crB2M_4         | CCAGAAAGAGAGAGTAGCGC |
| crB2M_5         | CACAGCTAAGGCCACGGAGC |
| crB2M_6         | GGCCGAGATGTCTCGCTCCG |
| crB2M_7         | TTGCGGGAGCGCATGCCTTT |
| crB2M_8         | CCACCTCTTGATGGGGCTAG |
| crB2M_9         | ATACCTTGGGTTGATCCACT |
| crB2M_10        | CGTGAGTAAACCTGAATCTT |
| crB2M_11        | AAGTCAACTTCAATGTCCGA |
| crB2M_12        | CATAGATCGAGACATGTAAG |
| crB2M_13        | GCTACTCTCTTTTCTGGCC  |
| crB2M_14        | ACCCAAACCAAGCCTTTCTA |
| crB2M_15        | TATAAGTGGAGGCGTCGCGC |

### **PCR primers used for CEL assay**

|                 |                           |                               |
|-----------------|---------------------------|-------------------------------|
| Fw: CCR5_CEL_F  | CTGCAAAAGGCTGAAGAGCA      | For all guides targeting CCR5 |
| Rev: CCR5_CEL_R | CCCCAAGATGACTATCTTTAATGTC |                               |
| Fw: Le277       | CTGGCTTGGAGACAGGTGAC      | For crB2M_6 and crB2M_13      |
| Rev: Le679      | GACGCTTATCGACGCCCTAA      |                               |
| Fw: Le680       | CAAAATCTTGCCGCCTTCCC      | For crB2M_8                   |
| Rev: Le681      | ACTTTCCAAAATGAGAGGCATGA   |                               |
| Fw: Le682       | CCAGAGTGGAAATGGAATTGGGA   | For crB2M_10                  |
| Rev: Le683      | ACTCATAACAACCTTTCAGCAGCTT |                               |
| Fw: Le684       | TCATGGGTAGGAACAGCAGC      | For crB2M_12                  |
| Rev: Le685      | TCTCCTCAGCAGAGATGTCC      |                               |

## FIGURES

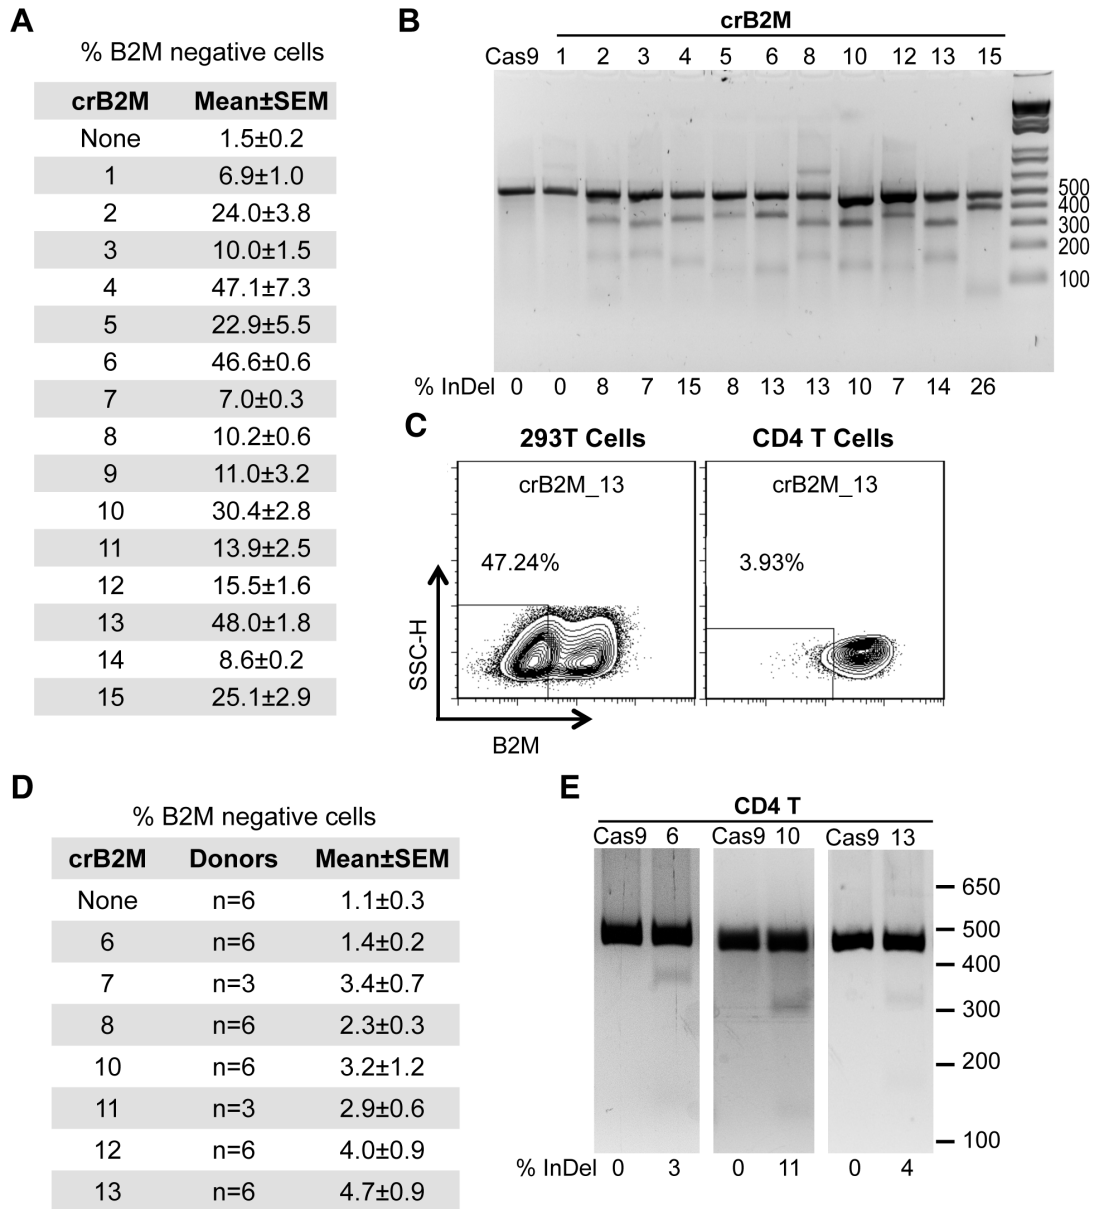

**Figure S1. Evaluation of on target mutational efficiencies of various gRNAs targeting *B2M* (Related to Figure 1).**

A) *B2M* deletion efficiency for all gRNAs targeting *B2M* locus in HEK293T cells as measured by flow cytometry. Pooled data from 3 independent experiments shown as mean±SEM. B) *B2M* deletion efficiencies of selected guides in HEK293T cells, measured as % InDels by CEL Surveyor assay. C) Comparison of *B2M* surface expression in HEK293T cells and primary CD4<sup>+</sup> T cells when transfected with Cas9 and guide crB2M\_13. D) *B2M* deletion efficiency for selected guides targeting the *B2M* locus in primary CD4<sup>+</sup> T-cells, as measured by flow cytometry. E) *B2M* deletion efficiencies of selected guides in primary CD4<sup>+</sup> T cells, measured as % InDels by CEL Surveyor assay.

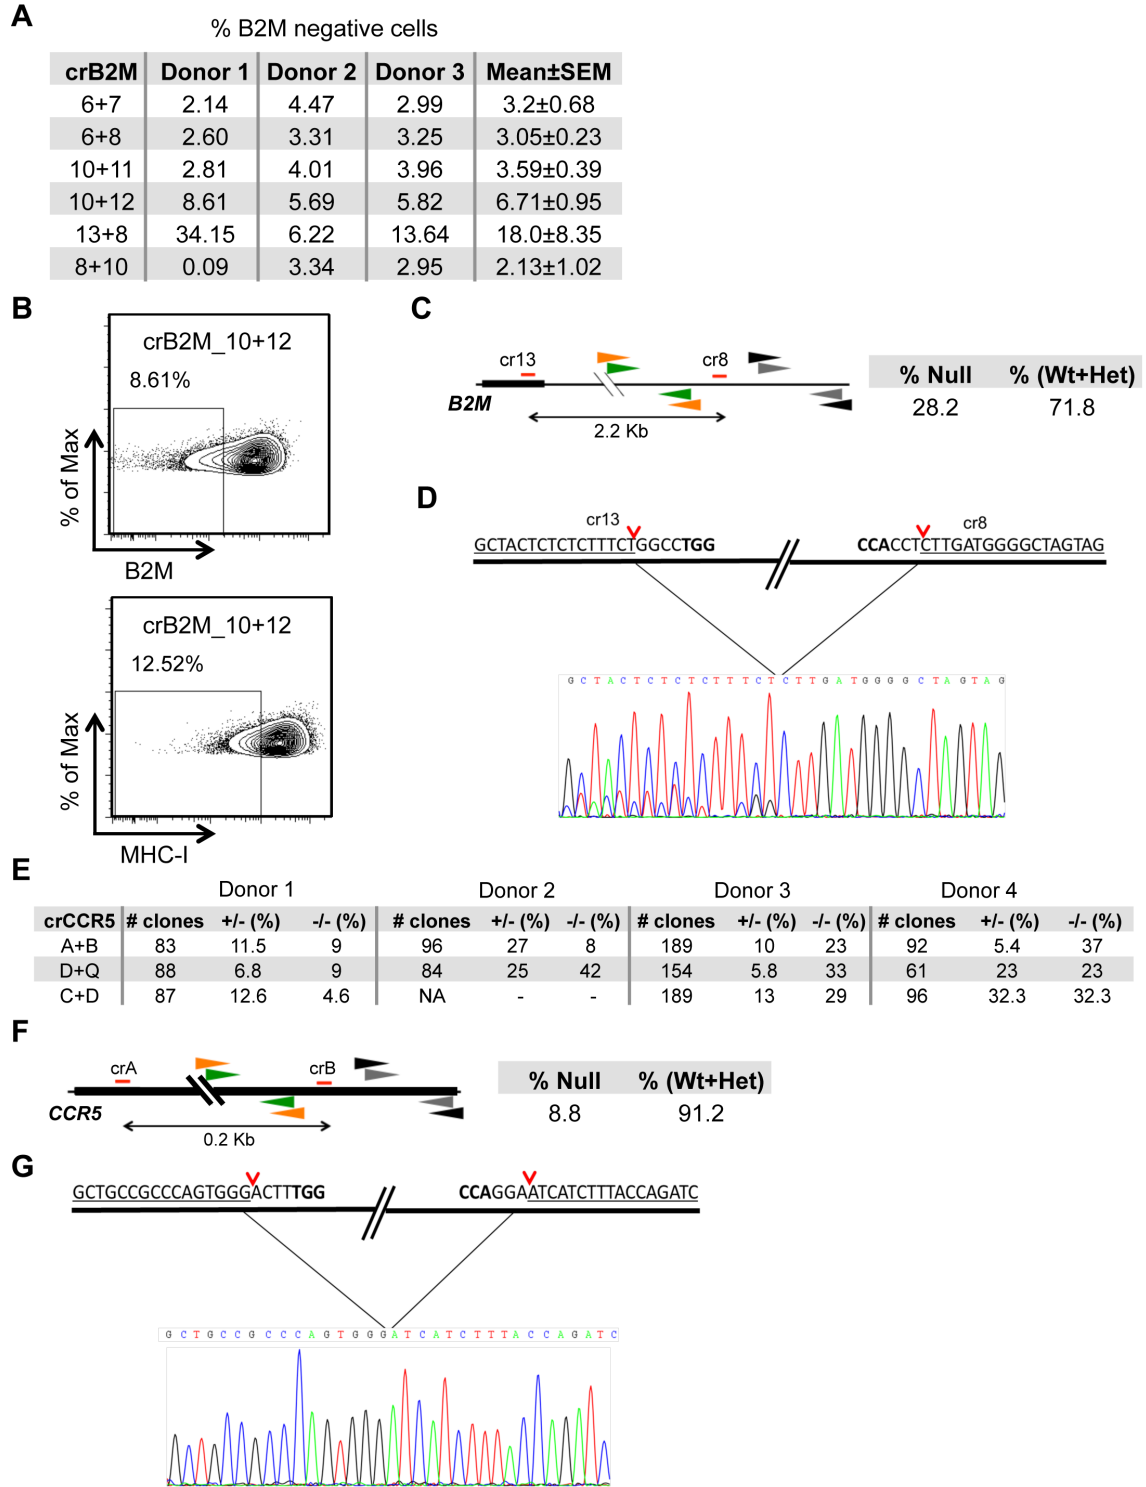

**Figure S2. Targeting efficiency of dual gRNA combinations (Related to Figure 2).**

A) B2M deletion efficiency for 6 dual gRNA combinations from three independent donors as measured by flow cytometry. B) FACS plots showing loss of MHC class I surface expression (bottom panel) following *B2M* deletion (top panel). C) Schematic of the single cell nested PCR



strategy for the *B2M* locus (left panel), black and gray arrowheads: control primer pairs, orange and green arrowheads: primer pairs flanking targeting region. % *B2M* null single cells is shown (right panel, n=301). D) Sanger sequencing chromatogram showing predicted deletion of targeted region at *B2M* locus. E) Clonal *CCR5* deletion efficiency for three dual gRNA combinations in  $CD34^+$  HSPC-mPB obtained from multiple donors. DNA isolated from individual colony was analyzed by PCR and gel electrophoresis. F) Schematic of the single cell nested PCR strategy (left panel) for determining deletion of *CCR5* in primary  $CD4^+$  T cells. % *CCR5* null single cells is shown (right panel, n=363). G) Sanger sequencing chromatogram shows predicted deletion at targeted region.

**A**

*crCCR5\_A*: GCTGCCGCCAGTGGGACTTTGG  
 CCR2: ACTG**TCTCCCTGTAGAAAAC**TGG

*crCCR5\_B*: GATCTGGTAAAGATGATTCCTGG  
 CCR2: CAT**TTAGTAAAGATGATTCC**TGG

*crCCR5\_C*: ACAATGTGTCAACTCTTGACAGG  
 CCR2: GCAT**TTTCTGTTCTC**-TGA-AGT

*crCCR5\_D*: TCACTATGC-TGCCGCCAGTGG  
 CCR2: TCACTAGGCATGCTGCC-AG**AGC**

*crCCR5\_Q*: GCTGTGTTTGC GTCTCTCCAGG  
 CCR2: GCTGTGTTTGC**TTCTGT**CCAGG

**B**

| Mutation           | crCCR5 treatment          |                     |              |                           |                     |              |                           |                     |              |
|--------------------|---------------------------|---------------------|--------------|---------------------------|---------------------|--------------|---------------------------|---------------------|--------------|
|                    | B                         |                     |              | A+B                       |                     |              | A                         |                     |              |
|                    | Reads Supporting Mutation | Total Reads at Site | Frequency    | Reads Supporting Mutation | Total Reads at Site | Frequency    | Reads Supporting Mutation | Total Reads at Site | Frequency    |
| One Base Insertion | 30                        | 5,963               | 0.50%        | 2                         | 5,339               | 0.04%        | 0                         | 4,678               | 0.00%        |
| Two Base Insertion | 0                         | 5963                | 0.00%        | 1                         | 5,339               | 0.02%        | 0                         | 4,678               | 0.00%        |
| One Base Deletion  | 5                         | 5,963               | 0.08%        | 9                         | 5,339               | 0.17%        | 4                         | 4,678               | 0.09%        |
| Two Base Deletion  | 1                         | 5,963               | 0.02%        | 1                         | 5,339               | 0.02%        | 0                         | 4,678               | 0.00%        |
| <b>Total</b>       | <b>36</b>                 | <b>5,963</b>        | <b>0.60%</b> | <b>13</b>                 | <b>5,339</b>        | <b>0.24%</b> | <b>4</b>                  | <b>4,678</b>        | <b>0.09%</b> |

**Figure 3. Potential off-target sites identified in CCR5 homologue CCR2 and analysis of events detected at the single off-target site in which mutagenesis was significantly detected above background (Related to Figure 4).**

A) Sequence alignment of CCR5 gRNAs utilized in this study in relation to the closest homologous sequence in CCR2 showing mismatched nucleotides in bold. Noteworthy is the fact that gRNA crCCR5\_B, which yielded the sole significantly detected off-target mutagenesis in CCR2 (detailed in panel B), has 3 nucleotide mismatches, which are distal to the PAM (underlined) and seed (grey box) sequences. B) In-depth analyses of all sequence reads at the single off-target site in which mutagenesis was significantly detected above background in both capture libraries treated with the associated gRNA (B; libraries treated with single gRNA crCCR5\_B & dual-gRNA crCCR5\_A+B), as well as the library treated with gRNA crCCR5\_A as a comparison. Total off-target mutation frequency at this site was 0.6% in the single gRNA treatment (crCCR5\_B) and notably decreased to 0.24% in the dual gRNA treatment (crCCR5\_A+B) in which gRNA plasmid concentration of each gRNA was half of that utilized in single gRNA treatments.

## **SUPPLEMENTAL TABLES**

Table S1. Predicted gRNA mapping in Ensembl GRCh37v71 (related to Figure 4). See the spread sheet.

**Table S2. Guide Pair crCCR5\_A+B On-Target Alleles, Related to Figure 4.**

| Allele                                   | Cas9 Guide Site | Sequence                                                                                              | Split Reads |            | Estimated Allele Frequency |
|------------------------------------------|-----------------|-------------------------------------------------------------------------------------------------------|-------------|------------|----------------------------|
|                                          |                 |                                                                                                       | (+) Strand  | (-) Strand |                            |
| Reference                                | A (Distal)      | TATGCTGCCGCCCCAGTGGACTTTGGAAAATACAATGTGTCAACTC                                                        | 1836        | 1728       | 3564                       |
| Reference                                | B (Proximal)    | GGCTGTGTTTGGCTCTCTCCAGGAATCACTTTTACCAGATCTCA                                                          | 1340        | 1753       | 3093                       |
| 206bp deletion                           | AB (Both)       | TATGCTGCCGCCCCAGTGGGA   ATCATCTTTACCAGATCTCAAAAAG                                                     | 411         | 411        | 822                        |
| 205bp inversion                          | AB (Both)       | GAGTTGACACATTGATTTCCAAAG   ATCATCTTTACCAGATCTCA<br>TATGCTGCCGCCCCAGTGGGA   TCCTGGGAGAGACGCAAAACACAGCC | 60          | 78         | 138                        |
| 1bp deletion                             | B (Proximal)    | TGGCTGTGTTTGGTCTCTCCAGG   ATCATCTTTACCAGATCTCA                                                        | 23          | 27         | 50                         |
| 206bp deletion with C insertion at break | AB (Both)       | TATGCTGCCGCCCCAGTGGGA   CATCATCTTTACCAGATCTCAAAA                                                      | 19          | 8          | 27                         |
| 1bp deletion                             | A (Distal)      | TATGCTGCCGCCCCAGTGGGA   TTTGGAAAATACAATGTGTCAACTCT                                                    | 14          | 11         | 25                         |
| 207bp deletion                           | AB (Both)       | TATGCTGCCGCCCCAGTGGGA   TCATCTTTACCAGATCTCAAAAAGA                                                     | 10          | 8          | 18                         |
| A insertion                              | B (Proximal)    | GCCTGTGTTTGGCTCTCTCCAGGAA   ATCATCTTTACCAGATCTCA                                                      | 7           | 8          | 15                         |
| A insertion                              | A (Distal)      | TATGCTGCCGCCCCAGTGGGA   ACTTTGGAAAATACAATGTGTCAACT                                                    | 4           | 7          | 11                         |
| 3bp deletion                             | A (Distal)      | TATGCTGCCGCCCCAGTGGGA   TGGAAAATACAATGTGTCAACTTTG                                                     | 7           | 0          | 7                          |
| 2bp deletion                             | B (Proximal)    | GTGGCTGTGTTTGGCTCTCTCCAG   ATCATCTTTACCAGATCTCA                                                       | 4           | 2          | 6                          |
| TC insertion                             | A (Distal)      | TATGCTGCCGCCCCAGTGGGA   TCCTTTGGAAAATACAATGTGTCAAC                                                    | 3           | 3          | 6                          |
| 209bp deletion                           | AB (Both)       | TATGCTGCCGCCCCAGTGGGA   ATCTTTACCAGATCTCAAAAAGAAG                                                     | 1           | 4          | 5                          |
| 4bp deletion                             | B (Proximal)    | TGGTGGCTGTGTTTGGCTCTCTCC   ATCATCTTTACCAGATCTCA                                                       | 4           | 0          | 4                          |
| 205bp deletion                           | AB (Both)       | TATGCTGCCGCCCCAGTGGGA   AATCATCTTTACCAGATCTCAAAA                                                      | 2           | 2          | 4                          |
| 206bp deletion with A insertion at break | AB (Both)       | TCACATATGCTGCCGCCCCAGTGGGA   ATCATCTTTACCAGATCTCA                                                     | 2           | 2          | 4                          |
| 12bp deletion                            | A (Distal)      | TATGCTGCCGCCCCAGTGGGA   AATGTCTCAACTTTTACAGGGCTC                                                      | 4           | 0          | 4                          |
| 2bp deletion                             | A (Distal)      | TATGCTGCCGCCCCAGTGGGA   TTGGAATACAATGTGTCAACTCTTT                                                     | 2           | 1          | 3                          |
| Unidentifiable novel sequence insertion  | B (Proximal)    | GAGTTACATGATCCCCCAATGTTGTG   ATCATCTTTACCAGATCTCA                                                     | 2           | 0          | 2                          |
| 5bp deletion                             | B (Proximal)    | GTGGTGGCTGTGTTTGGCTCTCC   ATCATCTTTACCAGATCTCA                                                        | 1           | 0          | 1                          |
| A->T transversion                        | B (Proximal)    | GGCTGTGTTTGGCTCTCTCCAGGATCACTTTTACCAGATCTCA                                                           | 0           | 1          | 1                          |
| 208bp deletion                           | AB (Both)       | TATGCTGCCGCCCCAGTGGGA   CATCTTTACCAGATCTCAAAAAGA                                                      | 1           | 0          | 1                          |
| 7bp deletion                             | A (Distal)      | TATGCTGCCGCCCCAGTGGGA   AATACAATGTGTCAACTCTTTGACAG                                                    | 0           | 1          | 1                          |
| 8bp deletion                             | A (Distal)      | TATGCTGCCGCCCCAGTGGGA   ATACAATGTGTCAACTCTTTGACAGG                                                    | 0           | 1          | 1                          |
| C->T transition                          | A (Distal)      | TATGCTGCCGCCCCAGTGGGAATTTGGAAAATACAATGTGTTCAACTC                                                      | 1           | 0          | 1                          |

**Table S3. Guide Pair crCCR5\_C+D On-Target Alleles, Related to Figure 4.**

| Allele                                                 | Cas9 Guide Site | Sequence                                           | Split Reads |            | Estimated Allele Frequency |
|--------------------------------------------------------|-----------------|----------------------------------------------------|-------------|------------|----------------------------|
|                                                        |                 |                                                    | (+) Strand  | (-) Strand |                            |
| Reference                                              | C (Proximal)    | ATACAATGTGTCAACTTTGACAGGGCTCTATTTTATAGGCTTCT       | 1704        | 1457       | 3161                       |
| Reference                                              | D (Distal)      | GGTCACTATAGCTGCCGCCAGTGGGACTTTGGAAATACAATGTG       | 1659        | 1459       | 3118                       |
| 35bp deletion                                          | CD (Both)       | GGCTCACTATAGCTGCCGCC   GACAGGGCTCTATTTTATAGGCTTC   | 310         | 270        | 580                        |
| 34bp deletion                                          | CD (Both)       | GGCTCACTATAGCTGCCGCC   TGACAGGGCTCTATTTTATAGGCTT   | 97          | 99         | 196                        |
| 33bp deletion                                          | CD (Both)       | GGCTCACTATAGCTGCCGCC   TTGACAGGGCTCTATTTTATAGGCT   | 23          | 11         | 34                         |
| 1bp deletion                                           | C (Proximal)    | AAATACAATGTGTCAACTCT   GACAGGGCTCTATTTTATAGGCTTCT  | 6           | 3          | 9                          |
| T->G transversion 1bp 5' of PAM                        | D (Distal)      | GGTCACTATAGCTGCCGCCAGGGGACTTTGGAAATACAATGTG        | 3           | 0          | 3                          |
| 3bp deletion                                           | D (Distal)      | GGTCACTATAGCTGCCGCC   GGGACTTTGGAAATACAATGTGTCA    | 3           | 0          | 3                          |
| Unidentifiable novel sequence insertion                | C (Proximal)    | CCGGCAAAACAACCACCCGC   GACAGGGCTCTATTTTATAGGCTTCT  | 3           | 0          | 3                          |
| 3bp deletion                                           | C (Proximal)    | GAAATACAATGTGTCAACT   GACAGGGCTCTATTTTATAGGCTTCT   | 3           | 0          | 3                          |
| 5bp deletion                                           | C (Proximal)    | TCACATATACAAATGTGTCAAGAC   AGGGCTCTATTTTATAGGCTTCT | 2           | 0          | 2                          |
| 2bp deletion                                           | C (Proximal)    | AAATACAATGTGTCAACT   GACAGGGCTCTATTTTATAGGCTTCT    | 0           | 2          | 2                          |
| 34bp deletion; breaks offset 1bp 3' of both Cas9 sites | CD (Both)       | GGCTCACTATAGCTGCCGCC   AACAGGGCTCTATTTTATAGGCTTC   | 1           | 0          | 1                          |
| G->A transition middle base of PAM                     | C (Proximal)    | ATACAATGTGTCAACTTTGACAAGGCTCTATTTTATAGGCTTCT       | 1           | 0          | 1                          |
| 19bp deletion                                          | C (Proximal)    | CCAGTGGGACTTTGGAAA   ACAGGGCTCTATTTTATAGGCTTCT     | 1           | 0          | 1                          |
| T->C transition 2bp 5' of Cas9 site                    | C (Proximal)    | ATACAATGTGTCAACTCT   GACAGGGCTCTATTTTATAGGCTTCT    | 1           | 0          | 1                          |
| T->C transition                                        | C (Proximal)    | ATACAATGTGTCAACTCTC   GACAGGGCTCTATTTTATAGGCTTCT   | 0           | 1          | 1                          |

**Table S4. Guide Pair crCCR5\_D+Q On-Target Alleles, Related to Figure 4.**

| Allele                                         | Cas9 Guide Site | Sequence                                            | Split Reads |            | Estimated Allele Frequency |
|------------------------------------------------|-----------------|-----------------------------------------------------|-------------|------------|----------------------------|
|                                                |                 |                                                     | (+) Strand  | (-) Strand |                            |
| Reference                                      | D (Distal)      | GGCTCACTATGCTGCGCCGCCATGSGGACITTTGGAAATCAATGTTG     | 1862        | 1261       | 2923                       |
| Reference                                      | Q (Proximal)    | GGTGGTGGCTGTGTTGGTCTCTCCAGGAATCACTTTTACCA           | 1296        | 1535       | 2831                       |
| 205bp deletion                                 | DQ (Both)       | TTCTGGCTCACTATGCTGCGCCGC   CCAGGAATCACTTTTACCA      | 332         | 269        | 601                        |
| 205bp deletion                                 | DQ (Both)       | GGCTCACTATGCTGCGCCGC   CCAGGAATCACTTTTACCA          | 321         | 248        | 569                        |
| 204bp deletion                                 | DQ (Both)       | GGCTCACTATGCTGCGCCGC   TCCAGGAATCACTTTTACCA         | 235         | 278        | 513                        |
| 204bp deletion                                 | DQ (Both)       | TTCTGGCTCACTATGCTGCGCCCT   CCAGGAATCACTTTTACCA      | 223         | 273        | 496                        |
| 205bp inversion                                | DQ (Both)       | GGCTCACTATGCTGCGCCGC   AGAGAGCAACACAGCCACCC         | 48          | 41         | 89                         |
| 19bp deletion                                  | D (Distal)      | CACATGTATTTCCAAAGTCCCACT   CCAGGAATCACTTTTACCA      | 41          | 24         | 65                         |
| 206bp inversion                                | DQ (Both)       | GGCTCACTATGCTGCGCCGC   AATGTCACTTTGACAGGGCTC        | 41          | 24         | 65                         |
| T insertion                                    | D (Distal)      | GGCTCACTATGCTGCGCCGC   AGAGAGCAACACAGCCACCC         | 26          | 18         | 44                         |
| T insertion                                    | Q (Proximal)    | ACATTTGTATTTCCAAAGTCCCACTTT   CCAGGAATCACTTTTACCA   | 8           | 9          | 17                         |
| 206bp deletion                                 | DQ (Both)       | GGCTCACTATGCTGCGCCGC   TAGTGGGACITTTGGAAATCAATGTTG  | 7           | 8          | 15                         |
| Unidentifiable novel sequence insertion        | DQ (Both)       | GGCTCACTATGCTGCGCCGC   CCAGGAATCACTTTTACCA          | 4           | 9          | 13                         |
| 208bp deletion                                 | Q (Proximal)    | CCCTTCTGGGCTCACTATGCTGCGC   CCAGGAATCACTTTTACCA     | 5           | 7          | 12                         |
| 207bp deletion                                 | DQ (Both)       | GGCTCACTATGCTGCGCCGC   AGGAATCACTTTTACAGATCTCA      | 4           | 5          | 9                          |
| 109bp deletion w/ TTA insertion                | D (Distal)      | GGCTCACTATGCTGCGCCGC   CCAGGAATCACTTTTACAGATCTC     | 2           | 7          | 9                          |
| 205bp deletion                                 | DQ (Both)       | GGCTCACTATGCTGCGCCGC   TTACTGTGCTCATGCTGTTTC        | 5           | 3          | 8                          |
| 219bp deletion                                 | D (Distal)      | GGCTCACTATGCTGCGCCGC   TCCAGGAATCACTTTTACCA         | 4           | 3          | 7                          |
| C insertion                                    | D (Distal)      | GGCTCACTATGCTGCGCCGC   TTACAGATCTCAAAAAGAGTCT       | 3           | 4          | 7                          |
| 14bp deletion                                  | D (Distal)      | GGCTCACTATGCTGCGCCGC   TGTFACCTCGACCTTAGCAGA        | 3           | 3          | 6                          |
| 202bp deletion                                 | D (Distal)      | GGCTCACTATGCTGCGCCGC   TGGGACTTTGGAAATCAATGTTG      | 2           | 3          | 5                          |
| 202bp deletion                                 | DQ (Both)       | GGCTCACTATGCTGCGCCGC   AATFACATGTTGCTTGTACAG        | 0           | 5          | 5                          |
| 215bp deletion                                 | DQ (Both)       | TGGCTCACTATGCTGCGCCGC   TCTCCAGGAATCACTTTTACCA      | 0           | 5          | 5                          |
| 4bp deletion                                   | Q (Proximal)    | TACTGTCCTTCTGGGCTCACTAT   CCAGGAATCACTTTTACCA       | 2           | 2          | 4                          |
| A insertion                                    | Q (Proximal)    | TGGTGTGGTGTGTTTGGGCTTT   CCAGGAATCACTTTTACCA        | 2           | 2          | 4                          |
| 1bp deletion                                   | Q (Proximal)    | ACTTGGTGGTGTGTTTGGCTT   CCAGGAATCACTTTTACCA         | 1           | 3          | 4                          |
| 72bp deletion                                  | D (Distal)      | GGCTCACTATGCTGCGCCGC   AAGTGGGACTTTGGAAATCAATGTT    | 3           | 0          | 3                          |
| 48bp deletion                                  | D (Distal)      | GGCTCACTATGCTGCGCCGC   GTGGGACTTTGGAAATCAATGTT      | 3           | 0          | 3                          |
| Unidentifiable novel sequence insertion        | D (Distal)      | GGCTCACTATGCTGCGCCGC   TCTTCACTCTCTGCAATGCA         | 3           | 0          | 3                          |
| 214bp deletion                                 | Q (Proximal)    | TTCTTTGATGAGTCAAAAATGCTT   CCAGGAATCACTTTTACCA      | 3           | 0          | 3                          |
| 50bp deletion                                  | D (Distal)      | GGCTCACTATGCTGCGCCGC   CATCTTACAGATCTCAAAAGA        | 2           | 1          | 3                          |
| 152bp deletion                                 | D (Distal)      | GGCTCACTATGCTGCGCCGC   AATAGGCTTCTCTGGAAATCTC       | 0           | 3          | 3                          |
| 181bp deletion                                 | DQ (Both)       | GGCTCACTATGCTGCGCCGC   TTGGGGTGTGACAGTGTGATCA       | 0           | 3          | 3                          |
| 62bp deletion                                  | DQ (Both)       | GGCTCACTATGCTGCGCCGC   TTAAAAGCCAGGACGGTCACTTTG     | 0           | 3          | 3                          |
| A->T inversion                                 | Q (Proximal)    | AGTGTGACTGTTGGTGGTGGCTG   CCAGGAATCACTTTTACCA       | 1           | 1          | 2                          |
| 8bp deletion                                   | D (Distal)      | GGCTCACTATGCTGCGCCGC   TCTGGAAATCTTCTCATCTCC        | 0           | 2          | 2                          |
| 195bp deletion                                 | DQ (Both)       | GGCTCACTATGCTGCGCCGC   TTGGAAATCAATGTTGAAATCAATGTTG | 0           | 2          | 2                          |
| 207bp deletion                                 | DQ (Both)       | GGCTCACTATGCTGCGCCGC   TTGGAAATCAATGTTGAAATCAATGTTG | 1           | 0          | 1                          |
| 17bp deletion                                  | Q (Proximal)    | GGCTCACTATGCTGCGCCGC   CCAGGAATCACTTTTACCA          | 1           | 0          | 1                          |
| A deletion                                     | D (Distal)      | GGCTCACTATGCTGCGCCGC   AATGTCACTTTGACAGGGCTC        | 0           | 1          | 1                          |
| 205bp deletion w/ G insertion                  | DQ (Both)       | GGCTCACTATGCTGCGCCGC   GTGGGACTTTGGAAATCAATGTTG     | 0           | 1          | 1                          |
| 187bp deletion w/ 1bp 5' of proximal guide PAM | DQ (Both)       | GGCTCACTATGCTGCGCCGC   CCAGGAATCACTTTTACCA          | 0           | 1          | 1                          |
| 218bp deletion                                 | DQ (Both)       | TTTACTGTGCTCATGCTGTTTC                              | 0           | 1          | 1                          |
| C insertion                                    | Q (Proximal)    | GGTGGTGGCTGTGTTGGGCTCTC   CCAGGAATCACTTTTACCA       | 0           | 1          | 1                          |

**Table S5. Off-target Sites with Statistically Significant Mutational Burden and their Comparison, Related to Figure 4.**

| Guide | Degenerate Sequence      | Predicted Binding Site |             | Fisher's Exact Test <i>p</i> |                       | N-Fold Enrichment |       |       |
|-------|--------------------------|------------------------|-------------|------------------------------|-----------------------|-------------------|-------|-------|
|       |                          | Chr                    | Start       | End                          | InDel                 | Split             | InDel | Split |
| B     | CCAGGAATCATCTTTACTAAATG  | 3                      | 46,399,538  | 46,399,561                   | 4.4x10 <sup>-13</sup> | 1.0000            | 3.51  | 0.47  |
| B     | CCAGGCATCTTTACCAGCTC     | 8                      | 104,258,547 | 104,258,570                  | 0.0165                | 1.0000            | 1.93  | 0.45  |
| C     | AAAATGTGTCAACTCTTGATTAG  | 12                     | 12,976,312  | 12,976,335                   | 0.0361                | 1.0000            | 1.56  | 0.27  |
| C     | AAAATGTGTCAACTCTTGATTAG  | 12                     | 12,976,312  | 12,976,335                   | 0.0361                | 1.0000            | 1.56  | 0.27  |
| C     | CCCAC TGGCTGCAGAAATACAGA | 10                     | 129,722,982 | 129,723,005                  | 0.0338                | 0.9996            | 1.82  | 0.50  |
| Q     | TCTGTGTTTGCCTCTCTCTCAGG  | 12                     | 19,270,661  | 19,270,684                   | 0.0086                | 1.0000            | 2.08  | 0.20  |
| Q     | CCCGGAGGGAGGCCAAAAACAGC  | 17                     | 11,833,418  | 11,833,441                   | 0.0083                | 1.0000            | 2.24  | 0.20  |

| gRNA | gRNA Combinations Tested | Mutation Frequency | On-Target Site                                  |                                                 | Most Significant Off-Target Site |                         |
|------|--------------------------|--------------------|-------------------------------------------------|-------------------------------------------------|----------------------------------|-------------------------|
|      |                          |                    | Variant Read Enrichment (Treatment vs. Control) | Variant Read Enrichment (Treatment vs. Control) | Fisher's Exact <i>p</i>          | Fisher's Exact <i>p</i> |
| A    | A, AB                    | 5.79%              | 58.59                                           | 1.84                                            | 0.1616                           |                         |
| B    | B, AB                    | 16.65%             | 51.02                                           | 3.51                                            | 4.416x10 <sup>-13</sup>          |                         |
| C    | C, CD                    | 17.02%             | 30.88                                           | 1.56                                            | 0.0361                           |                         |
| D    | D, CD, DQ                | 26.23%             | 57.64                                           | 1.82                                            | 0.0338                           |                         |
| Q    | DQ                       | 21.19%             | 46.84                                           | 2.24                                            | 0.0083                           |                         |

## REFERENCES

- Ding, Q., Lee, Y.K., Schaefer, E.A., Peters, D.T., Veres, A., Kim, K., Kuperwasser, N., Motola, D.L., Meissner, T.B., Hendriks, W.T., *et al.* (2013). A TALEN genome-editing system for generating human stem cell-based disease models. *Cell stem cell* 12, 238-251.
- Faust, G.G., and Hall, I.M. (2014). SAMBLASTER: fast duplicate marking and structural variant read extraction. *Bioinformatics* 30, 2503-2505.
- Hsu, P.D., Scott, D.A., Weinstein, J.A., Ran, F.A., Konermann, S., Agarwala, V., Li, Y., Fine, E.J., Wu, X., Shalem, O., *et al.* (2013). DNA targeting specificity of RNA-guided Cas9 nucleases. *Nature biotechnology* 31, 827-832.
- Langmead, B., Trapnell, C., Pop, M., and Salzberg, S.L. (2009). Ultrafast and memory-efficient alignment of short DNA sequences to the human genome. *Genome biology* 10, R25.
- Layer, R.M., Chiang, C., Quinlan, A.R., and Hall, I.M. (2014). LUMPY: a probabilistic framework for structural variant discovery. *Genome biology* 15, R84.
- Li H. (2013). Aligning sequence reads, clone sequences and assembly contigs with BWA-MEM. *arXiv*.
- Mali, P., Yang, L., Esvelt, K.M., Aach, J., Guell, M., DiCarlo, J.E., Norville, J.E., and Church, G.M. (2013). RNA-guided human genome engineering via Cas9. *Science* 339, 823-826.
- Talkowski, M.E., Ernst, C., Heilbut, A., Chiang, C., Hanscom, C., Lindgren, A., Kirby, A., Liu, S., Muddukrishna, B., Ohsumi, T.K., *et al.* (2011). Next-generation sequencing strategies enable routine detection of balanced chromosome rearrangements for clinical diagnostics and genetic research. *American journal of human genetics* 88, 469-481.
- Van der Auwera *et al.* (2013). From FastQ Data to High-Confidence Variant Calls: The Genome Analysis Toolkit Best Practices Pipeline. *Current Protocols in Bioinformatics*. 43:11.10.1-11.10.33.
- van der Burg, M., Kreyenberg, H., Willasch, A., Barendregt, B.H., Preuner, S., Watzinger, F., Lion, T., Roosnek, E., Harvey, J., Alcoceba, M., *et al.* (2011). Standardization of DNA isolation from low cell numbers for chimerism analysis by PCR of short tandem repeats. *Leukemia* 25, 1467-1470.
- Wang, K., Li, M., and Hakonarson, H. (2010). ANNOVAR: functional annotation of genetic variants from high-throughput sequencing data. *Nucleic acids research* 38, e164.
